# Supplementary material
Source: Springer Nature journal article supplement (https://www.springermedizin.de/resource/supplementary/12885_2008_1219_MOESM3_ESM.pdf/9471446)
Supplement: MOESM3 [file 9471446]

# Genotype frequencies of MDM2 additional intron 1 SNPs in the control and breast cancer populations

|         |           | Controls   |            |            |                              | Breast Cancer |        |            |            |           |
|---------|-----------|------------|------------|------------|------------------------------|---------------|--------|------------|------------|-----------|
| 309 SNP |           | 309T/T     | 309T/G     | 309G/G     | Mean age of cancer diagnosis | 309T/T        | 309T/G | 309G/G     |            |           |
|         | Total (%) | n (%)      | n (%)      | n (%)      | Total (%)                    | (years)       | n (%)  | n (%)      | n (%)      |           |
| 285 SNP | G/G       | 263 (95.6) | 123 (44.7) | 106 (38.5) | 34 (12.4)                    | 278 (93.0)    | 59.1   | 118 (39.5) | 129 (43.1) | 31 (10.4) |
|         | G/C       | 12 (4.4)   | - -        | 10 (3.6)   | 2 (0.7)                      | 18 (6.0)      | 61.7   | - -        | 12 (4.0)   | 6 (2.0)   |
|         | C/C       | - -        | - -        | - -        | - -                          | 3 (1.0)       | 68.7   | - -        | - -        | 3 (1.0)   |
|         |           | 275        |            |            | 299                          |               |        |            |            |           |
| 344 SNP | T/T       | 266 (96.7) | 117 (42.5) | 113 (41.1) | 36 (13.1)                    | 291 (97.3)    | 59.4   | 114 (38.1) | 137 (45.8) | 40 (13.4) |
|         | T/A       | 9 (3.3)    | 6 (2.2)    | 3 (1.1)    | - -                          | 8 (2.7)       | 55.1   | 4 (1.3)    | 4 (1.3)    | - -       |
|         | A/A       | - -        | - -        | - -        | - -                          | - -           | -      | - -        | - -        | - -       |
|         |           | 275        |            |            | 299                          |               |        |            |            |           |
| 443 SNP | G/G       | 270 (98.2) | 122 (44.4) | 112 (40.7) | 36 (13.1)                    | 297 (99.3)    | 59.3   | 117 (39.1) | 140 (46.8) | 40 (13.4) |
|         | G/T       | 5 (1.8)    | 1 (0.4)    | 4 (1.5)    | - -                          | 2 (0.7)       | 59.0   | 1 (0.3)    | 1 (0.3)    | - -       |
|         | T/T       | - -        | - -        | - -        | - -                          | - -           | -      | - -        | - -        | - -       |
|         |           | 275        |            |            | 299                          |               |        |            |            |           |
